# Supplementary material for: Treatment for Retinopathy of Prematurity in Twins: The Small Twin without High Birth Weight Discordant Is Not at Increased Risk
Source: Children (Basel). 2022 Jun 15;9(6):891. doi: 10.3390/children9060891 (PMC9222126; doi:10.3390/children9060891)
Supplement: Supplementary file 1 [file children-09-00891-s001.zip › children-1737668-SI.pdf]

## Supplementary materials

**Table S1. Characteristics and treatments of infants grouped according to small or large twins (BW discordance <5%)**

|                                                   | Small twin     | Large twin     | P    |
|---------------------------------------------------|----------------|----------------|------|
| Birth weight, g (Mean±SD)                         | 1266.58±381.76 | 1300.00±394.21 | 0.51 |
| Oxygen inhalation                                 |                |                |      |
| None, % (N)                                       | 11.1% (2)      | 11.1% (2)      | 1.00 |
| Mechanical ventilation, % (N)                     | 88.9% (16)     | 88.9% (16)     |      |
| Therapy                                           |                |                |      |
| None, % (N)                                       | 47.4% (9)      | 31.6% (6)      | 0.41 |
| Laser/ intravitreal injection of anti-VEGF, % (N) | 52.6% (10)     | 63.2% (12)     |      |
| Scleral buckling/vitreectomy, % (N)               | 0% (0)         | 5.3% (1)       |      |

**Table S2. Characteristics and treatments of infants grouped according to small or large twins (BW discordance 5~9%)**

|                                                   | Small twin     | Large twin     | P    |
|---------------------------------------------------|----------------|----------------|------|
| Birth weight, g (Mean±SD)                         | 1396.00±380.41 | 1493.87±405.94 | 0.50 |
| Oxygen inhalation                                 |                |                |      |
| None, % (N)                                       | 7.1% (1)       | 0.0% (0)       | 0.48 |
| Mechanical ventilation, % (N)                     | 92.9% (13)     | 100.0% (15)    |      |
| Therapy                                           |                |                |      |
| None, % (N)                                       | 40.0% (6)      | 53.3% (8)      | 0.52 |
| Laser/ intravitreal injection of anti-VEGF, % (N) | 53.3% (8)      | 33.3% (5)      |      |
| Scleral buckling/vitreectomy, % (N)               | 6.7% (1)       | 13.3% (2)      |      |

**Table S3. Characteristics and treatments of infants grouped according to small or large twins (BW discordance 10~19%)**

|                                                   | Small twin     | Large twin     | P    |
|---------------------------------------------------|----------------|----------------|------|
| Birth weight, g (Mean±SD)                         | 1224.38±245.44 | 1392.00±297.34 | 0.09 |
| Oxygen inhalation                                 |                |                |      |
| None, % (N)                                       | 12.5% (2)      | 12.5% (2)      | 1.00 |
| Mechanical ventilation, % (N)                     | 7.5% (14)      | 7.5% (14)      |      |
| Therapy                                           |                |                |      |
| None, % (N)                                       | 43.8% (7)      | 31.3% (5)      | 0.55 |
| Laser/ intravitreal injection of anti-VEGF, % (N) | 43.8% (7)      | 62.5% (10)     |      |
| Scleral buckling/vitreectomy, % (N)               | 12.5% (2)      | 6.3% (1)       |      |

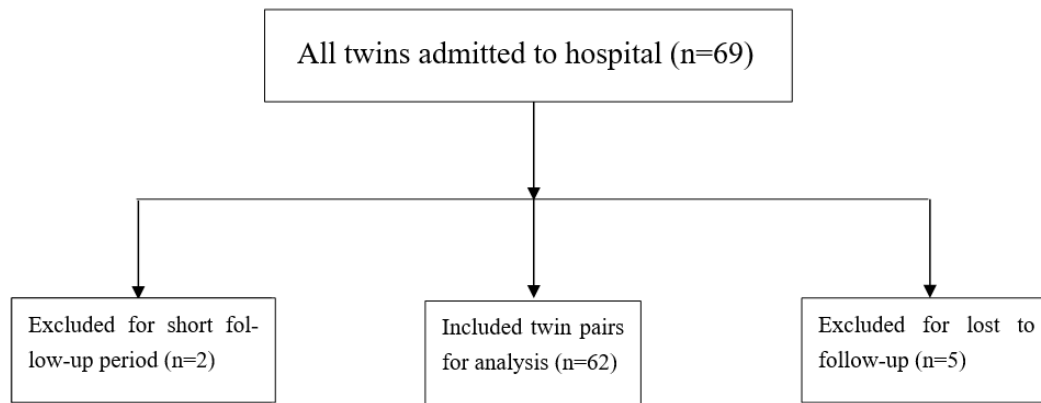

**Figure S1. Flowchart for the inclusion of twins**
